# Supplementary material for: White-light electroluminescence from a layer incorporating a single fully-organic spiro compound with phosphine oxide substituents
Source: Royal Society of Chemistry journal article supplement (doi:10.1039/d0tc03285a), 2020-01-01
Supplement: d0tc03285a1.pdf [file d0tc03285a1.pdf]

## White-Light Electroluminescence from a Layer Incorporating a Single Fully-Organic Spiro Compound with Phosphine Oxide Substituents

P. Tourneur<sup>a,†</sup>, F. Lucas<sup>b,†</sup>, C. Quinton<sup>b</sup>, Y. Olivier<sup>c</sup>, R. Lazzaroni<sup>a,d</sup>, P. Viville<sup>d</sup>, J. Cornil<sup>a</sup>, and C. Poriel<sup>b</sup>

<sup>a</sup> *Laboratory for Chemistry of Novel Materials, Materials Research Institute, University of Mons, Mons, Belgium. E-mail: [jerome.cornil@umons.ac.be](mailto:jerome.cornil@umons.ac.be).*

<sup>b</sup> *Université de Rennes, CNRS, ISCR-UMR 6226, F-35000 Rennes, France. E-mail: [cyril.poriel@univ-rennes1.fr](mailto:cyril.poriel@univ-rennes1.fr).*

<sup>c</sup> *Unité de Chimie Physique Théorique et Structurale (UCPTS) & Laboratoire de Physique du Solide (LPS), Namur Institute of Structured Matter (NISM), University of Namur, Namur, Belgium. E-mail: [yoann.olivier@unamur.be](mailto:yoann.olivier@unamur.be).*

<sup>d</sup> *Materia Nova, Materials R&D center, Mons, Belgium. E-mail: [pascal.viville@materianova.be](mailto:pascal.viville@materianova.be).*

<sup>†</sup> First authorship shared.

### Supporting information

#### Table of contents:

|                                              | <b>Pages</b> |
|----------------------------------------------|--------------|
| Additional figures                           | 2-4          |
| Estimation of the fluorescence quantum yield | 5            |
| Film preparation                             | 5            |
| OLED devices                                 | 5-6          |

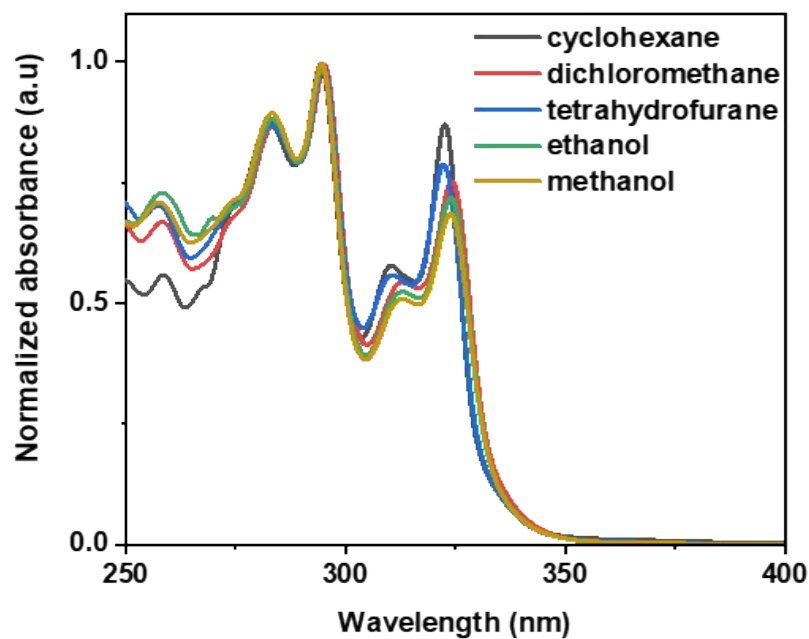

Figure S1 - Normalized absorption spectrum of SPA-F-(POPh<sub>2</sub>)<sub>2</sub> in different solvents recorded at room temperature without heating.

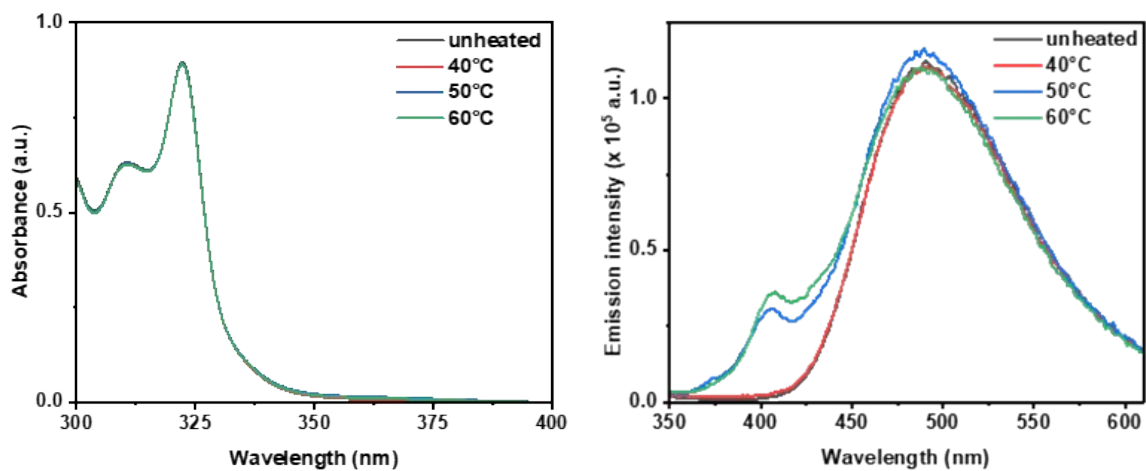

Figure S2 - Evolution of the absorption (left) and emission (right) spectra of SPA-F-(POPh<sub>2</sub>)<sub>2</sub> in THF upon heating at a concentration of  $4.4 \times 10^{-5}$  mol/L. The solution is heated during 30 minutes for each temperature and the spectra are recorded once the solution has cooled down to room temperature.



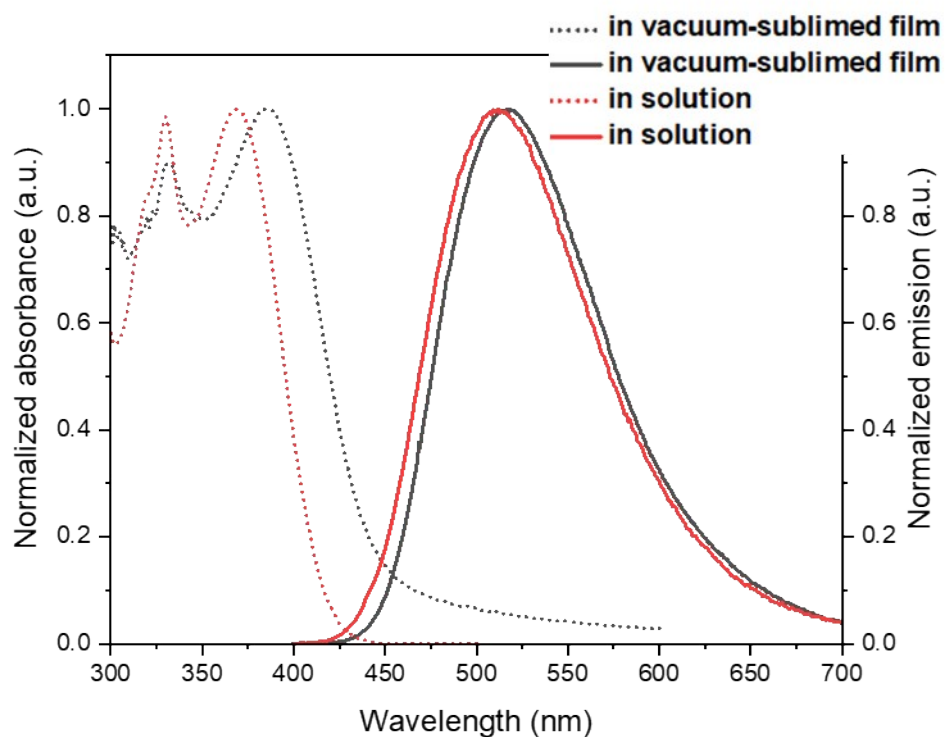

Figure S3 - Absorption and emission spectra of 2CZPN in THF and in vacuum-sublimed films.

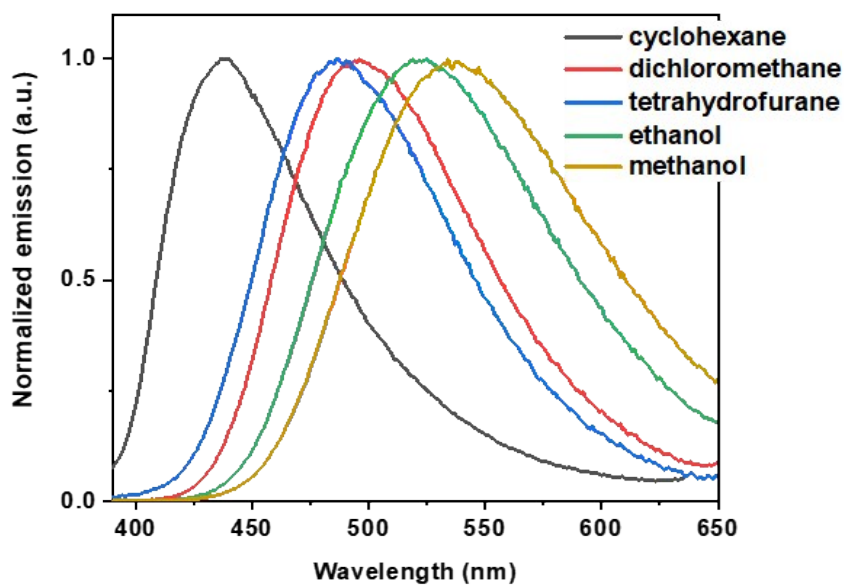

Figure S4 - Normalized emission spectrum of SPA-F-(POPh<sub>2</sub>)<sub>2</sub> in different solvents upon excitation at 330 nm, as recorded at room temperature without heating ( $A_{(330\text{ nm})} < 0.1$ ). The concentration used is  $> 6 \times 10^{-5}$  mol/L.

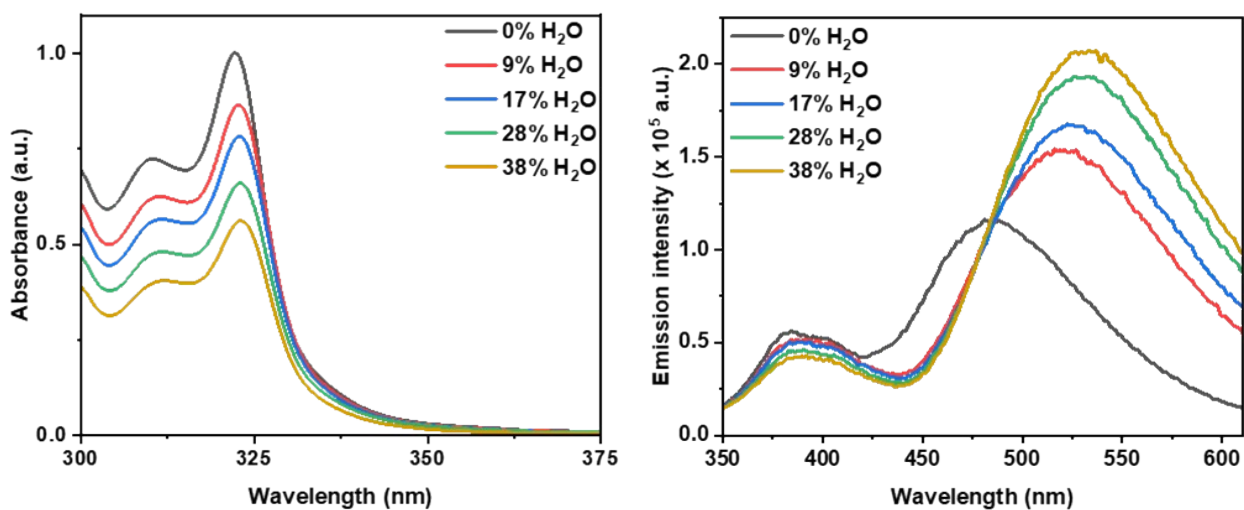

Figure S5 - Evolution of the absorption (left) and emission (right) spectrum in THF upon progressive addition of water. The initial concentration is  $4.8 \times 10^{-5}$  mol/L.

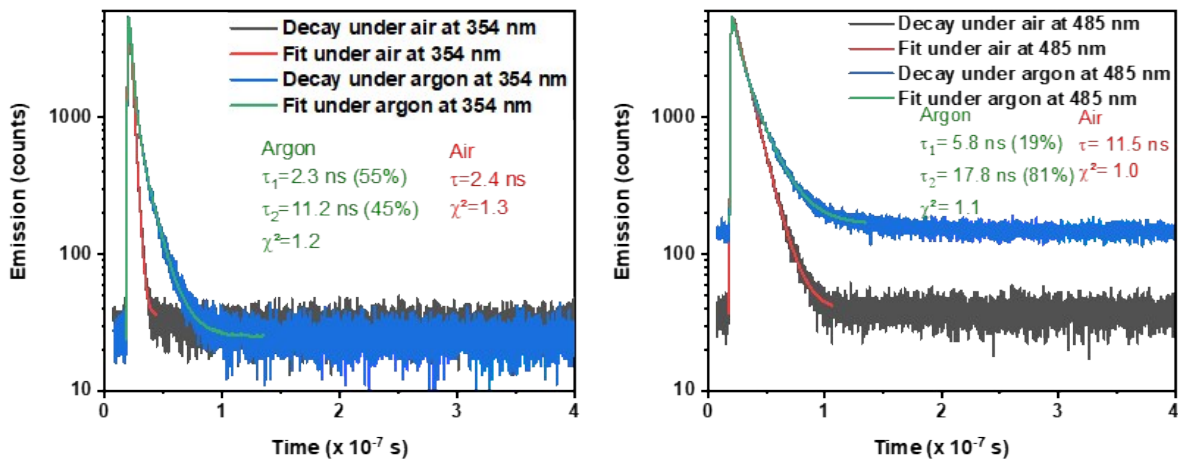

Figure S6 - Transient PL decay of SPA-F(POPh<sub>2</sub>)<sub>2</sub> in THF under air (black) argon (blue) at (left)  $\lambda_{em} = 354$  nm and (right)  $\lambda_{em} = 485$  nm. The concentration is  $< 6 \times 10^{-5}$  mol/L.

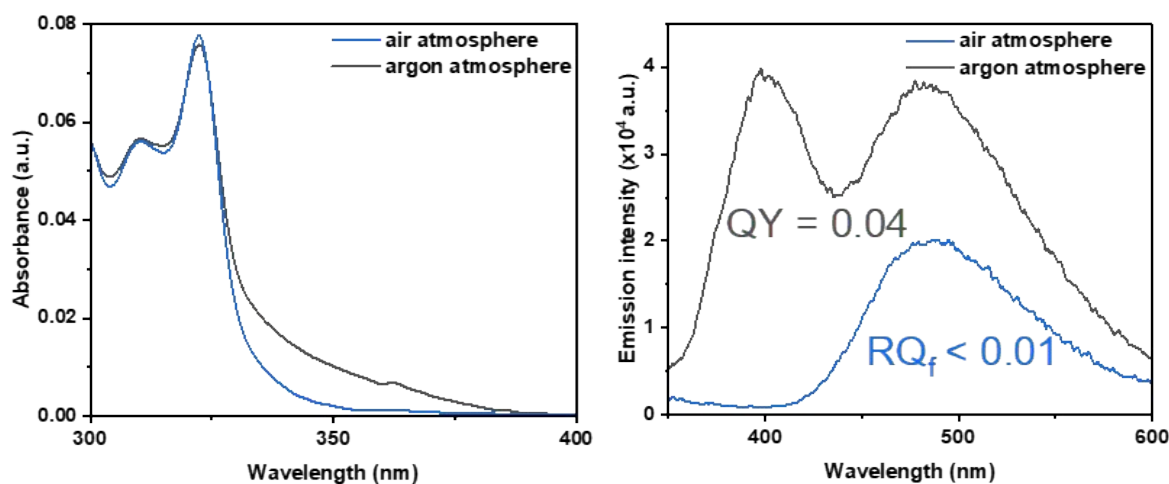

**Figure S7** - Absorption (left) and emission (right) spectra of **SPA-F(POPh<sub>2</sub>)<sub>2</sub>** in THF under air (blue) and argon (black). Quantum yields (QY) are noted in the right graph. The concentration is  $< 6 \times 10^{-5}$  mol/L.

#### *Estimation of the fluorescence quantum yield*

Quantum yields in solution ( $\phi_{sol}$ ) were calculated relative to quinine sulfate ( $\phi_{ref} = 0.546$  in H<sub>2</sub>SO<sub>4</sub> 1 N).  $\phi_{sol}$  was determined according to the following equation:

$$\phi_{sol} = \phi_{ref} \times \frac{S_s \times A_r}{S_r \times A_s} \times \left( \frac{\eta_s}{\eta_r} \right)^2$$

where subscripts *s* and *r* refer respectively to the sample and reference, *S* is the integrated fluorescence intensity and *A* the absorbance at the excitation wavelength,  $\eta$  is the refractive index of the solvent ( $\eta_s = 1.405$  for THF).

#### *Film preparation*

Thin films were prepared either by spin-coating ca 300  $\mu$ L of a THF solution of **SPA-F(POPh<sub>2</sub>)<sub>2</sub>** on sapphire plate (10 mm  $\times$  10 mm) at 2500tr/min on a Süss+MicroTec Lab Spin6/8 or by vacuum-deposition using a Kurt J. Leskers "Spectros" thin film evaporator system in glovebox (JACOMEX) and on a glass substrate.

## **OLED devices**

#### *General fabrication procedures*

Commercial ITO coated-glasses from Naranjo have been used as patterned substrates for device fabrication. Prior deposition, substrates were first cleaned in different ultrasonic baths during 10 min with

solutions of 10% RBS detergent in demineralized water, tap water, demineralized water and acetone, and finally with an UV/ozone cleaning system from UVOCS.

All devices have been fabricated in glovebox (JACOMEX) with a Kurt J. Leskers “Spectros” thin film evaporator system.

Device encapsulation with a dense layer of Al<sub>2</sub>O<sub>3</sub> has been carried out using an Atomic Layer Deposition (ALD) SAVANNAH 100 system (from Annealsys) in order to protect the devices prior measurements of the EQE.

*Characterization:*

Curves of current density (mA/cm<sup>2</sup>) and luminance (Cd/m<sup>2</sup>) have been obtained using a luminance meter LS-110 system from MINOLTA equipped with a 135 Lens model and a Keithley 2400 Source measuring unit.

The EQE of the devices have been calculated using the equation:

$$EQE = \frac{P_{ext}}{n_e} = \frac{\int_{380}^{780} \frac{Radiance}{Photon\ energy}}{\frac{J \times A}{q}} = \frac{\int_{380}^{780} \frac{W(\lambda) d\lambda}{h \times \frac{c}{\lambda}}}{\frac{J \times A}{q}}$$

where A is the device area, J the measured current density and q the charge of an electron.

The radiance (λ) spectrum of the devices has been measured with a LED analyzer OmniLED-LMS10 system from Labsphere equipped with a 10” integrating sphere and a Keithley 2400 Source measuring unit. The use of an integrating sphere allows to collect all emitted photons in all directions and hence to avoid a correction in the emission spectrum with a Lambertian’s law.

Color Recording Index (CRI) coordinates, from CIE, have been recorded with the same integrating sphere.

The turn-on voltages (V<sub>ON</sub>) have been estimated from the crossing of the two tangents of the current-voltage curves.
